# Supplementary material for: Exsolution of Fe, Co, and Ni supported catalysts from LaBO3 (B = Fe, Co, Ni) perovskites for ammonia synthesis
Source: Royal Society of Chemistry journal article supplement (doi:10.1039/d4nj03626c), 2024-01-01
Supplement: d4nj03626c1.pdf [file d4nj03626c1.pdf]

Supporting Information

**Exsolution of Fe, Co, and Ni supported catalysts from  
LaBO<sub>3</sub> (B = Fe, Co, Ni) perovskites for ammonia  
synthesis**

Nan Zhou<sup>1, #</sup>, Fanyi Kong,<sup>1, #</sup> Ya Tang<sup>\*, 2</sup>

<sup>1</sup> Key Laboratory of Organic Compound Pollution Control Engineering (MOE), School of Environmental and Chemical Engineering, Shanghai University, Shanghai 200444, China.

<sup>2</sup> Department of Chemistry, School of Science, Shanghai University, No.99, Shangda Road, Baoshan District, Shanghai, China.

\*corresponding author: Ya Tang<sup>\*, 2</sup>

# Authors contributed equally.

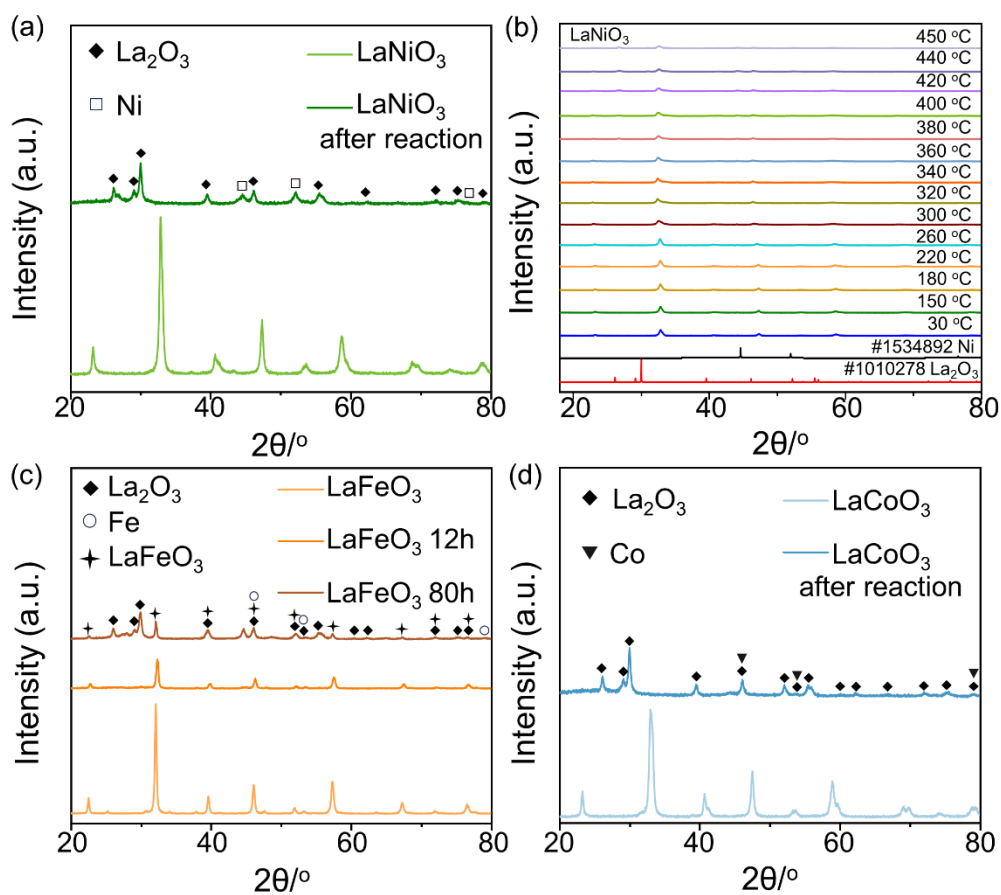

**Figure S1.** Comparison of X-ray diffraction patterns after ammonia synthesis reaction. (a)  $\text{LaNiO}_3$  before and after reaction (b) In situ XRD at 30 to 450 °C under a hydrogen-nitrogen mixture,  $\text{N}_2/\text{H}_2 = 1:3$  (c)  $\text{LaFeO}_3$  before and after reaction (d)  $\text{LaCoO}_3$  before and after reaction.

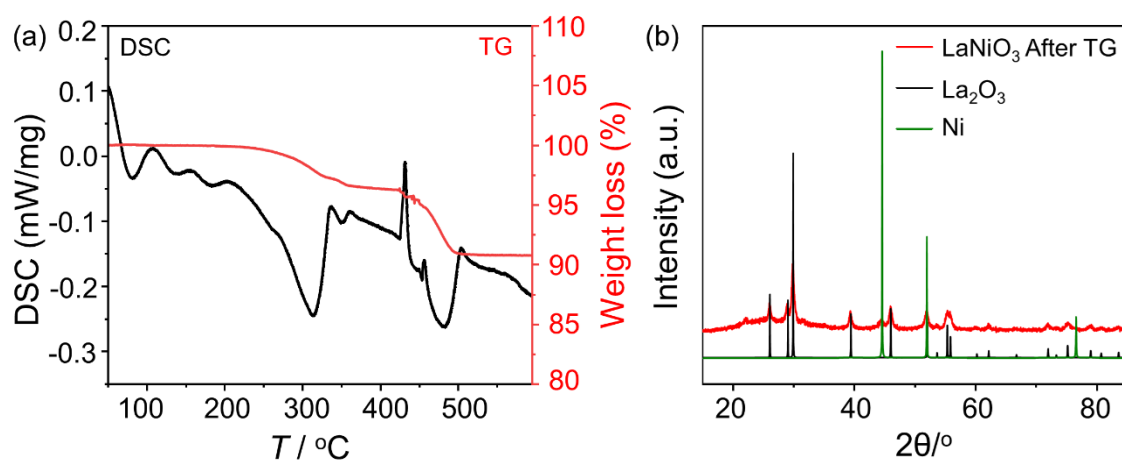

**Figure S2.** (a) TG-DSC curves of LaNiO<sub>3</sub> in hydrogen-nitrogen mixtures (H<sub>2</sub> 75% / N<sub>2</sub> 25%) (b) XRD before and after TG reaction.

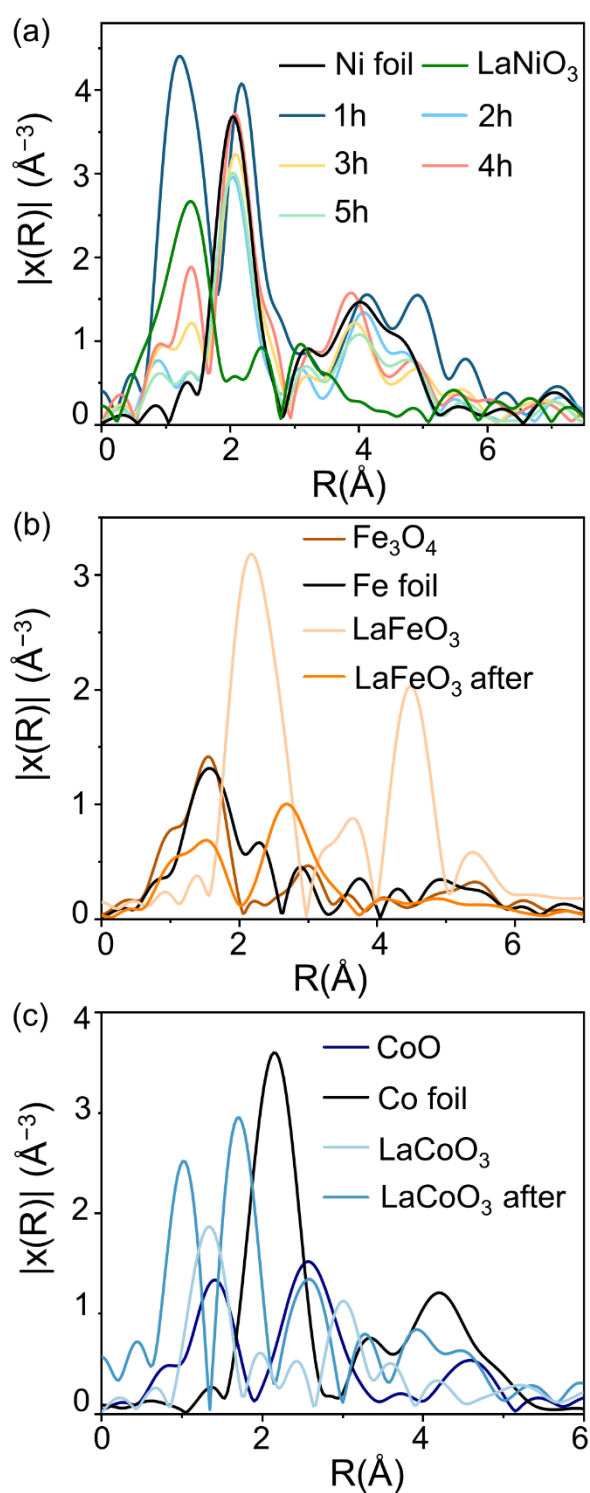

**Figure S3.** (a)-(c). R-space environment changes of  $\text{LaBO}_3$  (B= Ni/Fe/Co) collected before and after the ammonia synthesis reaction at Ni K-edge , Fe K-edge , Co K-edge , respectively. Among them, CoO and  $\text{Fe}_3\text{O}_4$  are commercially available pharmaceuticals.

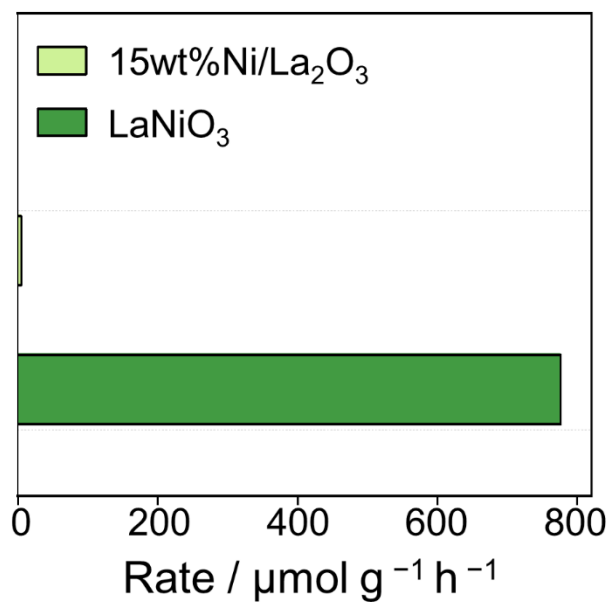

**Figure S4.** Comparison of ammonia synthesis performance of 15wt% Ni/La<sub>2</sub>O<sub>3</sub> synthesized by impregnation method and LaNiO<sub>3</sub> in situ formation catalysts.

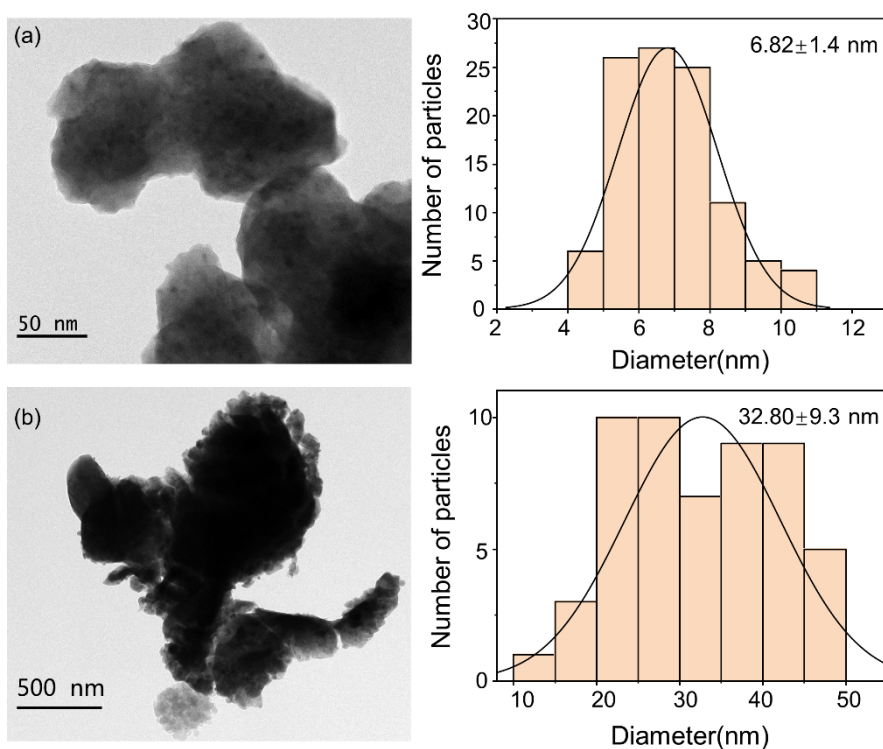

**Figure S5.** TEM image and particle size analysis based on the image. (a)LaNiO<sub>3</sub>(reaction temperature: 500 °C). (b) 15wt%Ni/La<sub>2</sub>O<sub>3</sub> (reaction temperature:500 °C).
